# Supplementary material for: Antibiotic susceptibility test under a linear concentration gradient using travelling surface acoustic waves
Source: Royal Society of Chemistry journal article supplement (doi:10.1039/d1lc00418b), 2021-01-01
Supplement: d1lc00418b1.pdf [file d1lc00418b1.pdf]

## Supporting Information

# Antibiotic susceptibility test under a linear concentration gradient using travelling surface acoustic waves

Yongtaek Im,<sup>a</sup> Seunggyu Kim,<sup>a</sup> Jinsoo Park,<sup>\*ab</sup> Hyung Jin Sung,<sup>\*a</sup> and Jessie S. Jeon<sup>\*a</sup>

<sup>a</sup> Department of Mechanical Engineering, KAIST, Daejeon 34141, Korea

<sup>b</sup> School of Mechanical Engineering, Chonnam National University, Gwangju 61186, Korea

\* Co-corresponding authors

## Supplementary figures

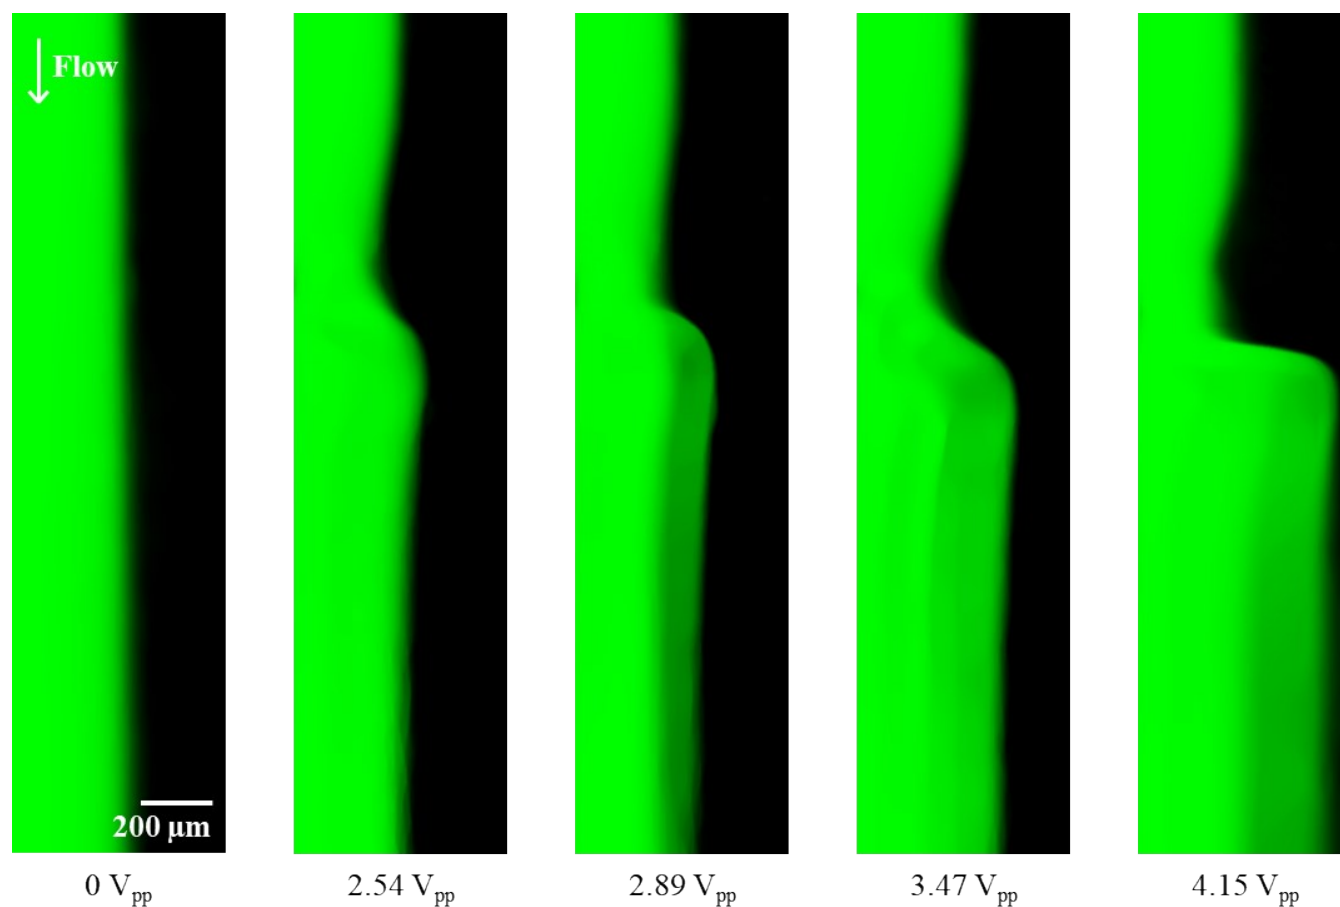

**Fig. S1** Fluorescent and antibiotic-free fluid are injected at the left and right inlets at flow rates of 100  $\mu\text{L/h}$ , respectively. A linear antibiotic concentration gradient produced by applying an electrical potential 0, 2.54, 2.89, 3.47 and 4.15  $V_{pp}$

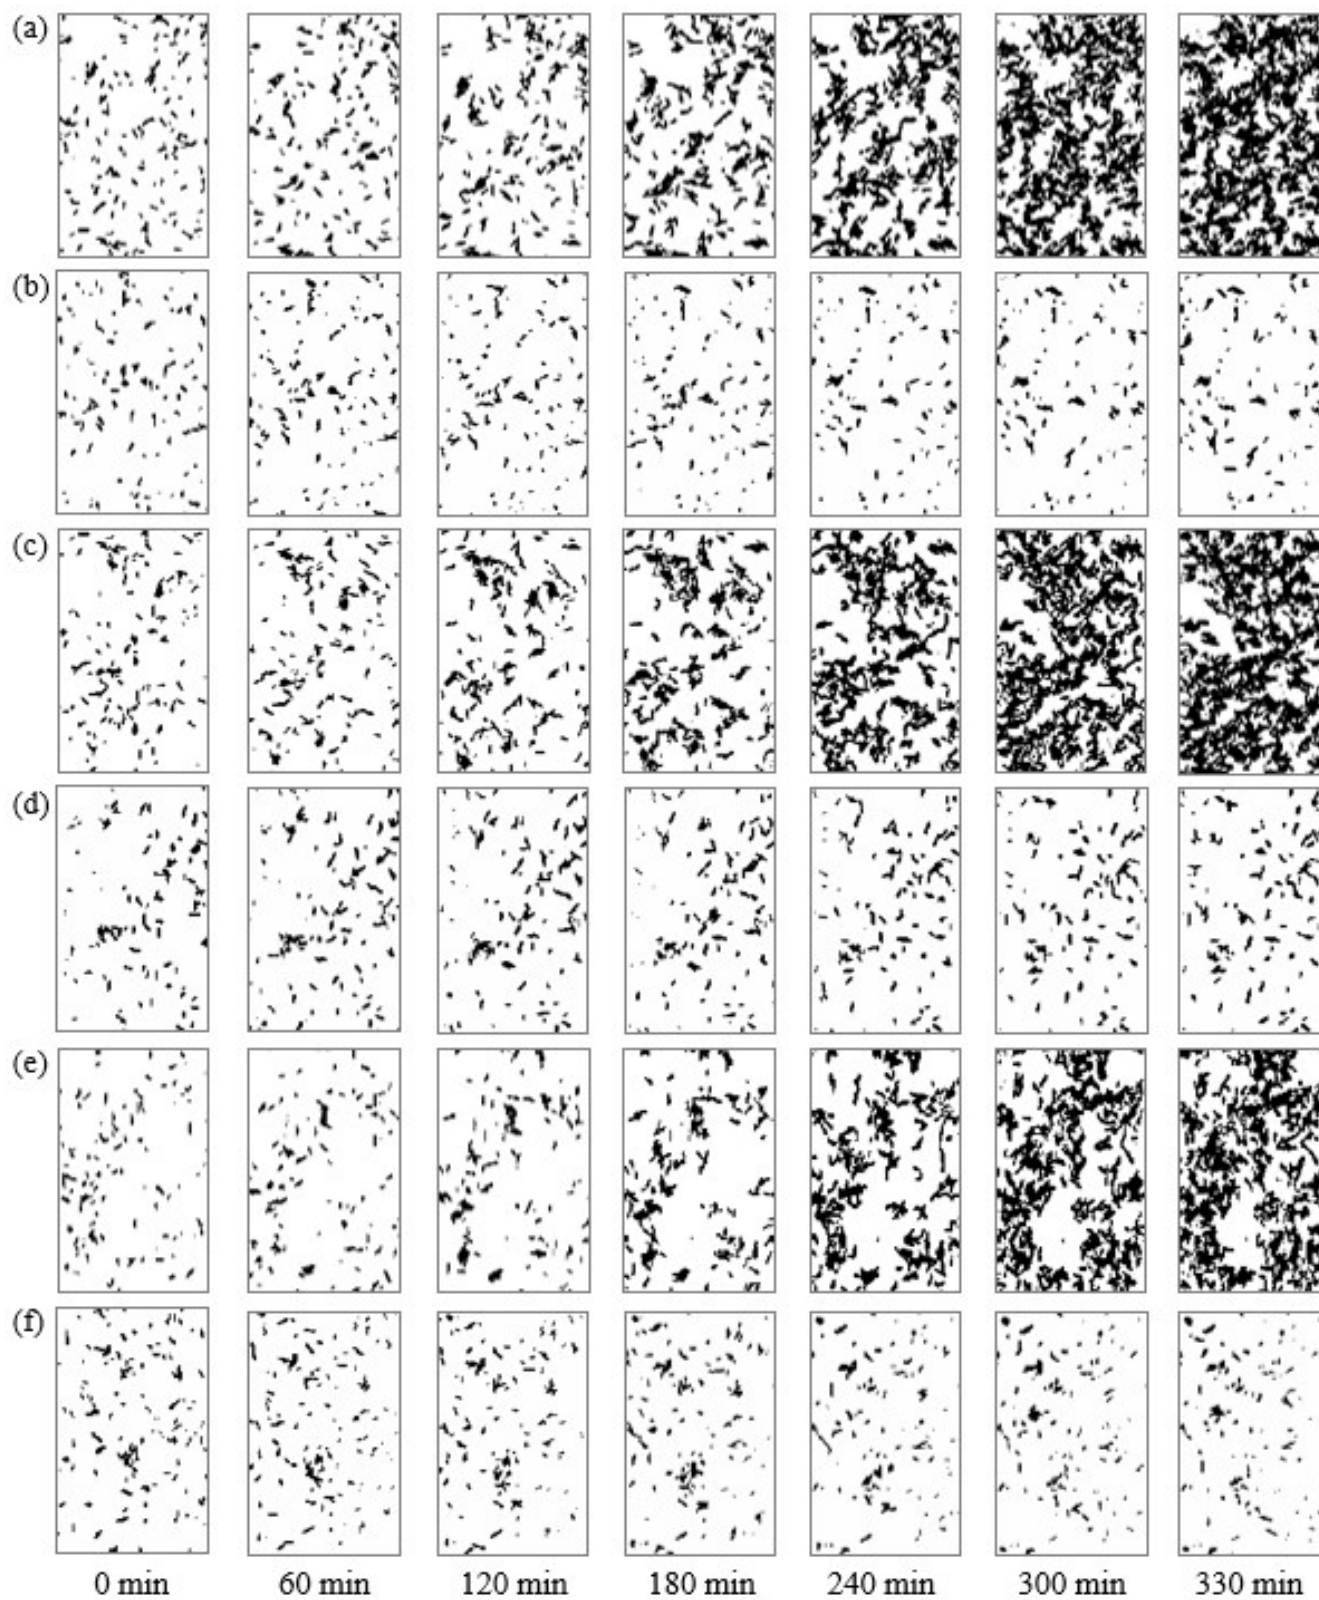

**Fig. S2** Time-lapse growth images of *P. aeruginosa* under (a) 1.2  $\mu\text{g}/\text{mL}$  gentamicin. (b) 2.7  $\mu\text{g}/\text{mL}$  gentamicin. (c) 2.5  $\mu\text{g}/\text{mL}$  levofloxacin. (d) 5.2  $\mu\text{g}/\text{mL}$  levofloxacin, respectively. Time-lapse growth images of *E. coli* under (e) 1.1  $\mu\text{g}/\text{mL}$  gentamicin. (f) 2.8  $\mu\text{g}/\text{mL}$  gentamicin, respectively.

Supplementary Movie S1: Switching gradient generation
